# Supplementary material for: Locating pollutant emission sources with optical remote sensing measurements and an improved one-dimensional radial plume mapping technique
Source: Royal Society of Chemistry journal article supplement (doi:10.1039/c2em10380j), 2012-01-01
Supplement: c2em10380j.pdf [file c2em10380j.pdf]

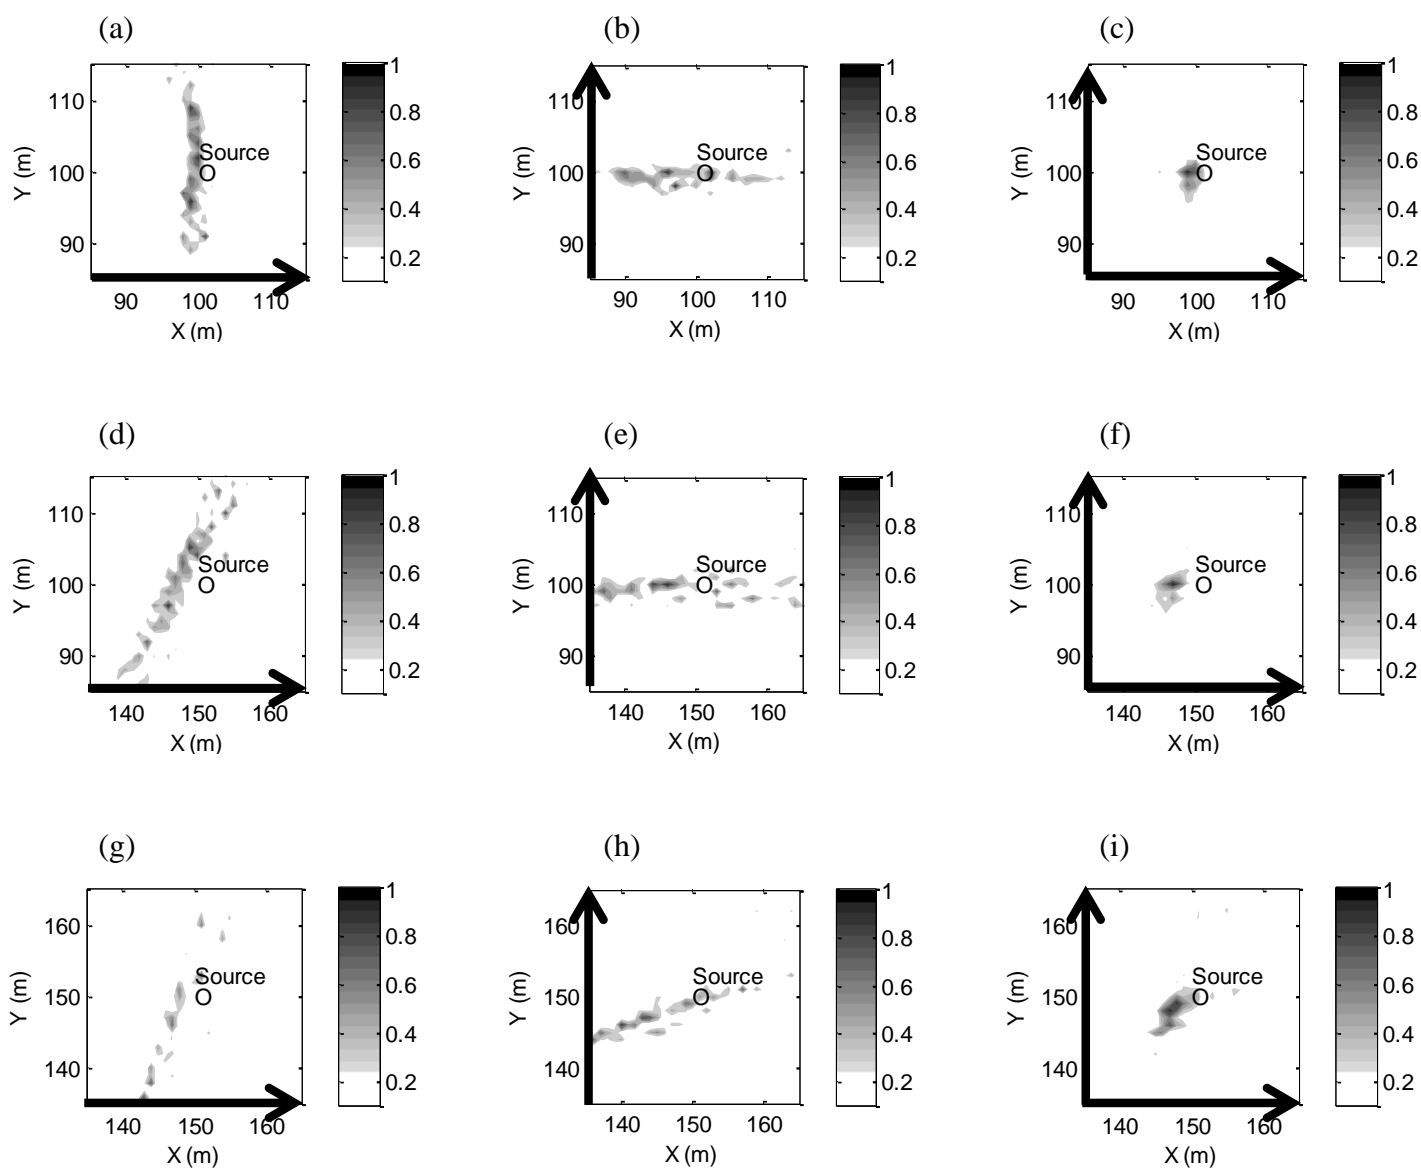

Appendix 1. Reconstruction results at three example source locations after adding 30% of noise to the simulated  $PIC_{obs}$  and recalculating the source locations. The grayscale bar represents their relative frequency of occurrence. Rows 1 to 3: Source at (100, 100), (150, 100), and (150, 150), respectively. Columns 1 to 3: Reconstructed by the X-RPM<sub>ID</sub>, Y-RPM<sub>ID</sub>, and XY-RPM<sub>ID</sub> approaches, respectively.
